# Supplementary material for: A Laser-Induced Graphene-Titanium(IV) Oxide Composite for Adsorption Enhanced Photodegradation of Methyl Orange
Source: Nanomaterials (Basel). 2023 Mar 5;13(5):947. doi: 10.3390/nano13050947 (PMC10005721; doi:10.3390/nano13050947)
Supplement: Supplementary file 1 [file nanomaterials-13-00947-s001.zip › nanomaterials-2235233-supplementary.pdf]

## **Supplementary Information**

### **A Laser-Induced Graphene-Titanium (IV) Oxide Composite for Adsorption Enhanced Photodegradation of Methyl Orange**

Brhane A. Tesfahunegn, Maurício Nunes Kleinberg, Camilah D. Powell  
and Christopher J. Arnusch \*

Department of Desalination and Water Treatment, Zuckerberg Institute for Water Research,  
The Jacob Blaustein Institutes for Desert Research, Ben-Gurion University of the Negev,  
Midreshet Ben-Gurion 8499000, Israel

#### **\* Corresponding Author Details:**

Dr. Christopher J. Arnusch  
Department of Desalination and Water Treatment  
Zuckerberg Institute for Water Research  
The Jacob Blaustein Institutes for Desert Research  
Ben-Gurion University of the Negev  
Sde Boqer Campus  
8499000 Midreshet Ben-Gurion, Israel  
Phone: +972-8-656-3532  
Email: [arnusch@bgu.ac.il](mailto:arnusch@bgu.ac.il)

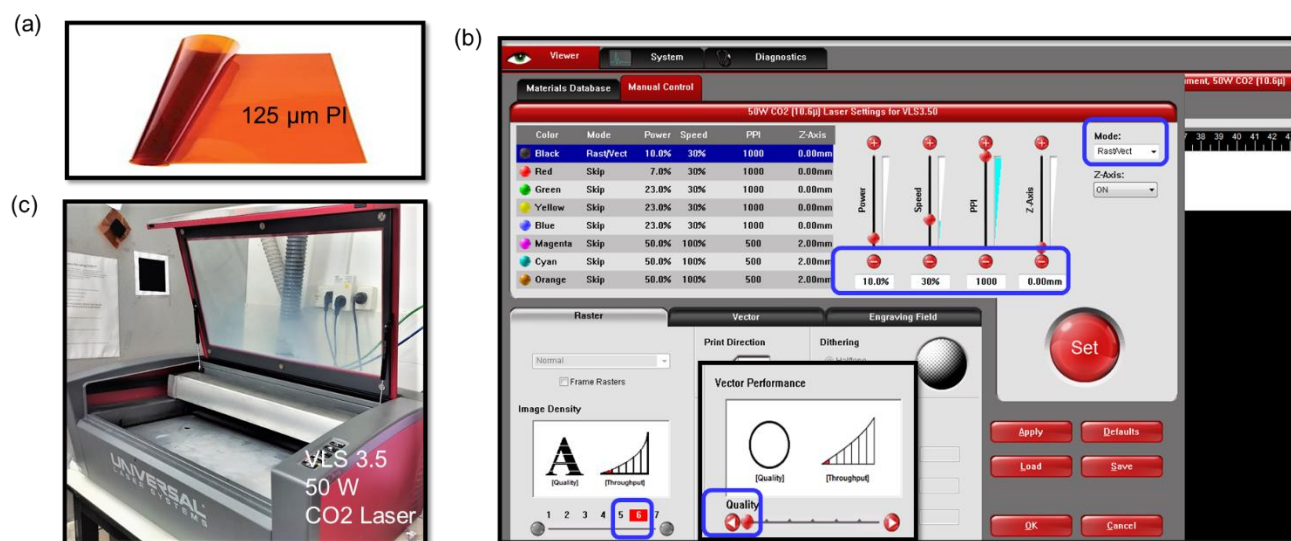

**Figure S1.** (a) PI substrate; (b) Laser parameters used during LIG/TiO<sub>2</sub> fabrication as viewed in the software of the VLS 3.50 laser from Universal Laser Systems; (c) Photograph of the laser system used.

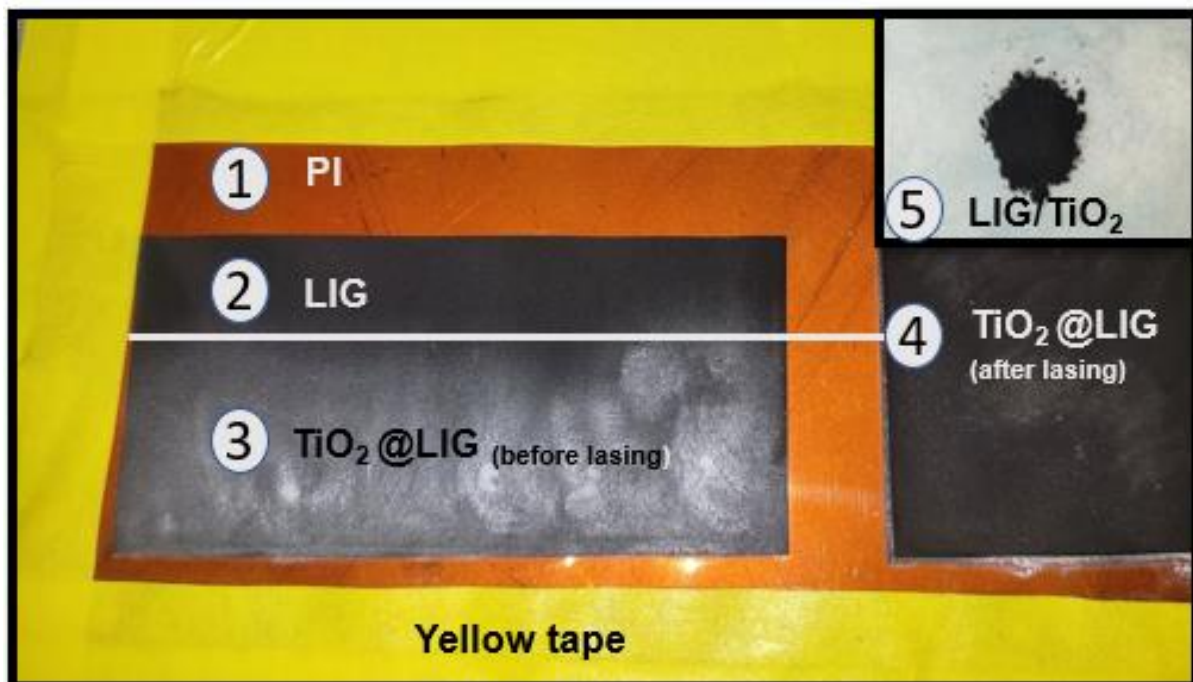

**Figure S2.** LIG/TiO<sub>2</sub> fabrication process, showing (1) the polyimide (PI) substrate, (2) LIG fabricated on the PI substrate, (3) TiO<sub>2</sub> coated LIG (before second lasing), (4) LIG/TiO<sub>2</sub> composite after second lasing, and (5) the LIG/TiO<sub>2</sub> powder obtained after scraping the composite from the PI surface.

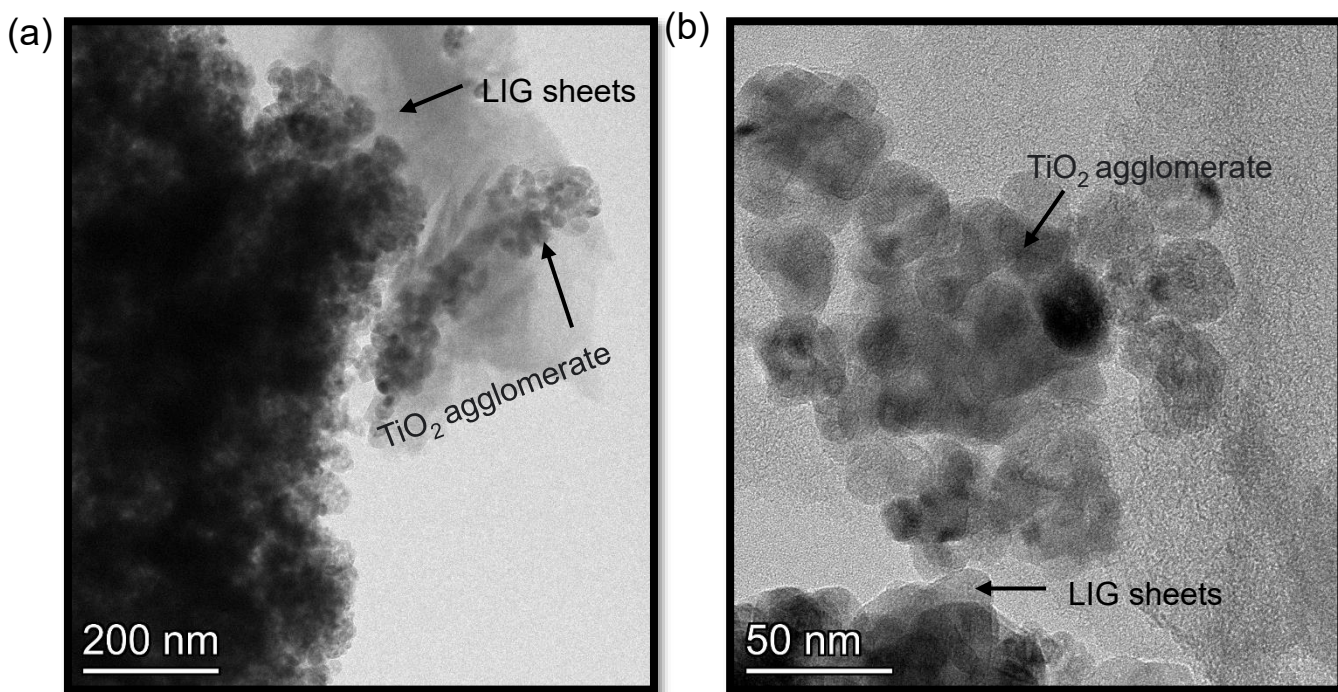

**Figure S3.** TEM images of LIG/TiO<sub>2</sub> composite. (a) TEM image showing both LIG sheets and TiO<sub>2</sub> nanoparticles and agglomerates, scale bar 200 nm; (b) TEM image at a higher magnification showing both LIG sheets and TiO<sub>2</sub> nanoparticles and agglomerates scale bar 50 nm.

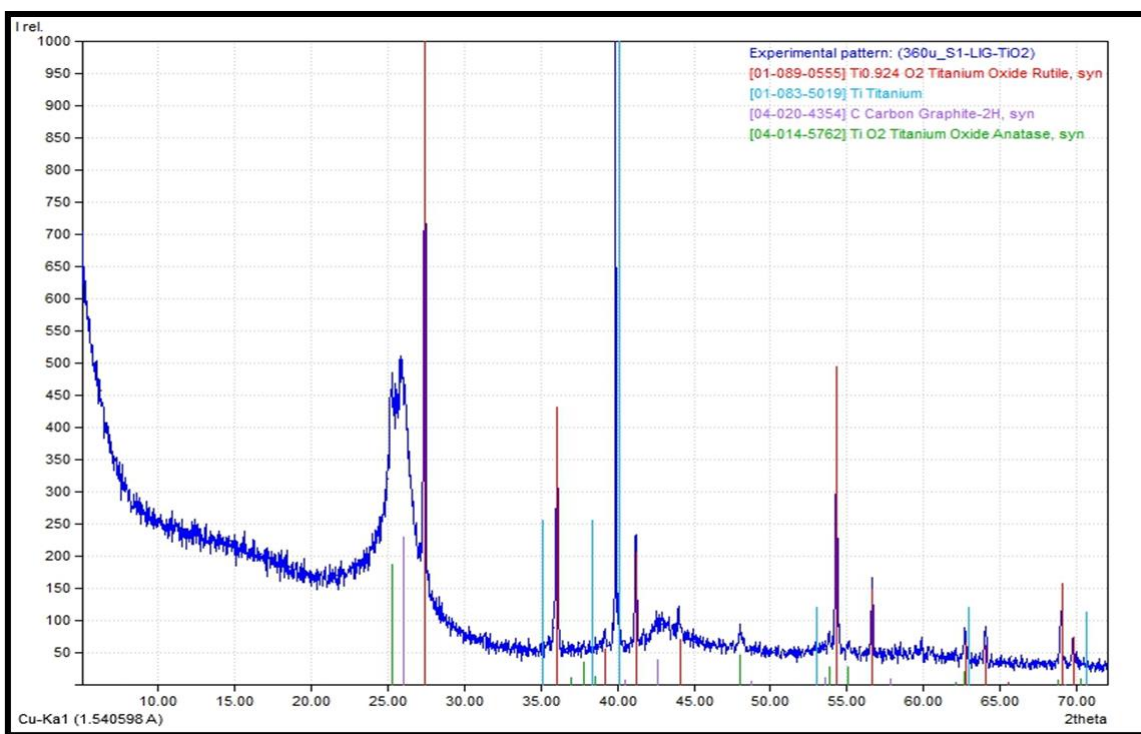

**Figure S4.** XRD phase/composition identification of LIG/TiO<sub>2</sub> sample.

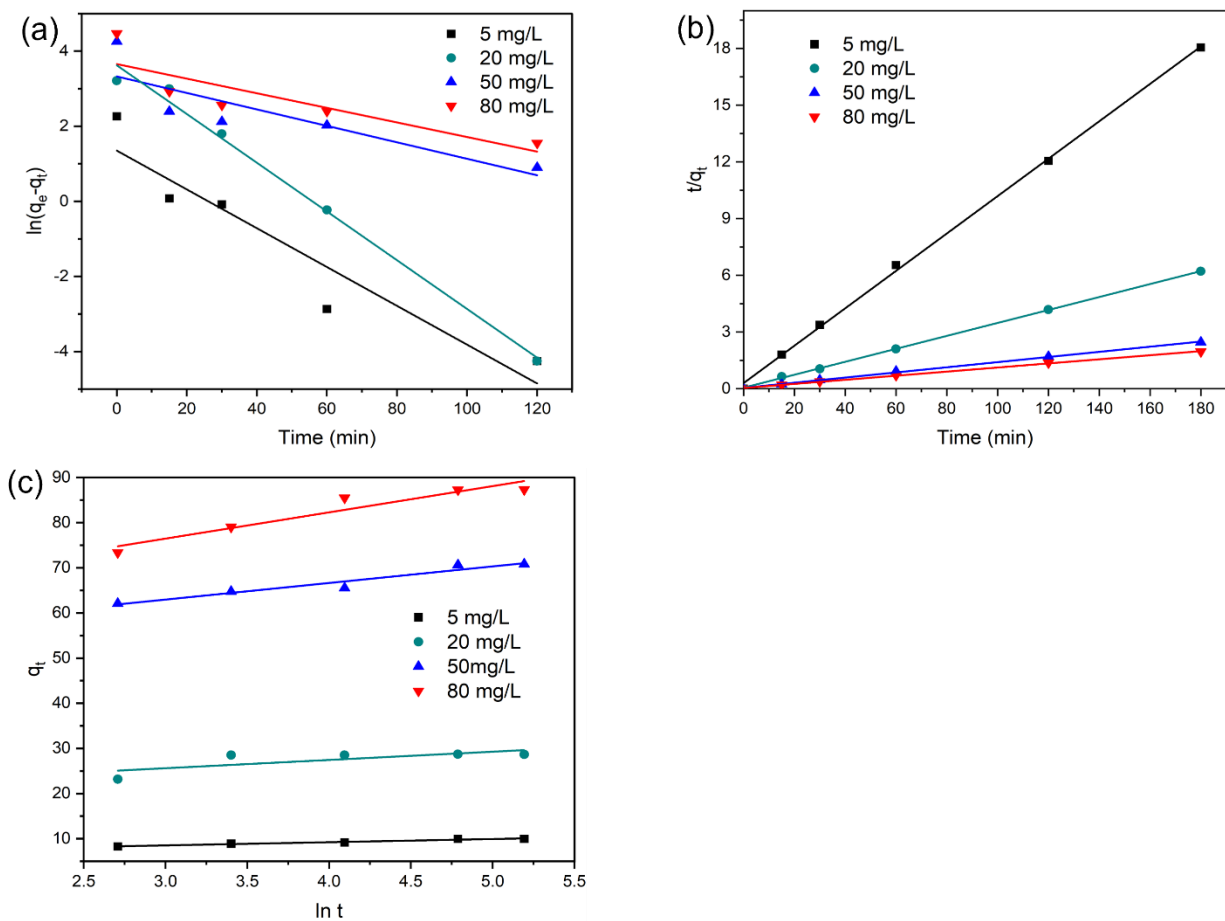

**Figure S5.** Adsorption kinetic models (a) Pseudo first order; (b) Pseudo second order; (c) Elovich
